# Supplementary material for: Side-by-side comparison of BH3-mimetics identifies MCL-1 as a key therapeutic target in AML
Source: Springer Nature journal article supplement (doi:10.1038/s41419-019-2156-2), 2019-12-04
Supplement: MOESM9 [file 41419_2019_2156_MOESM9_ESM.zip]

Archive with 9 entries (9 files):
- 41419_2019_2156_MOESM1_ESM.tif
- 41419_2019_2156_MOESM2_ESM.tif
- 41419_2019_2156_MOESM3_ESM.tif
- 41419_2019_2156_MOESM4_ESM.tif
- 41419_2019_2156_MOESM5_ESM.tif
- 41419_2019_2156_MOESM6_ESM.tif
- 41419_2019_2156_MOESM7_ESM.tif
- 41419_2019_2156_MOESM8_ESM.tif
- 41419_2019_2156_MOESM9_ESM.docx
